# Supplementary material
Source: PubMed Central journal article supplement (PMC4738704)
Supplement: supp_111.043828_Supplementary_Table_I.pdf [file supp_111.043828_Supplementary_Table_I.pdf]

### Supplementary Table I.

Title” The impact of SNPs on human Aldehyde Oxidase”

Authors: Tobias Hartmann, Mineko Terao, Enrico Garattini, Christian Teutloff, Joshua

F. Alfaro, Jeffrey P. Jones, and Silke Leimkühler

Journal: Drug Metabolism and Disposition.

| Exon | Structure of amplimers           | Nucleotide position in NT_005403 | Length of PCR product(bp) |
|------|----------------------------------|----------------------------------|---------------------------|
| 1    | 5'-gttggactttaggctccagcaagc-3'   | 60,123-60,146                    | 273                       |
|      | 5'-ttaaaccggcgggcacgaaaggatg-3'  | complementary to 60,371-60,395   |                           |
| 2    | 5'-gagtgggtggttgcatacacagc-3'    | 67,123-67,146                    | 401                       |
|      | 5'-ggccacatttgcactgcctata-3'     | complementary to 67,500-67,523   |                           |
| 3    | 5'-ctgtgatattactgtctcctagtggc-3' | 69,327-69,352                    | 294                       |
|      | 5'-gccagttctttcacatggtaggt-3'    | complementary to 69,597-69,620   |                           |
| 4    | 5'-agtggagaagctcagtgaatgcct-3'   | 71,452-71,475                    | 274                       |
|      | 5'-cgctctcttaatctcagggactca-3'   | complementary to 71,702-71,725   |                           |
| 5    | 5'-ctgggatcttgctagaatgcagg-3'    | 73,672-73,695                    | 303                       |
|      | 5'-cagccccgggcaacagagtgagatt-3'  | complementary to 73,950-73,974   |                           |
| 6    | 5'-gtcctcatttccatcacactcttg-3'   | 76,343-76,366                    | 244                       |
|      | 5'-catgtattagtaagatggctgccc-3'   | complementary to 76,563-76,586   |                           |
| 7    | 5'-gtttcaactggcattcacctgctt-3'   | 77,325-77,348                    | 258                       |
|      | 5'-gggtagccatttgttcttctaag-3'    | complementary to 77,559-77,582   |                           |
| 8    | 5'-gtcggtttgcgtatctgactgtg-3'    | 78,053-78,076                    | 280                       |
|      | 5'-gccaatcagctttgagagaacct-3'    | complementary to 78,309-78,332   |                           |
| 9    | 5'-tcccaggagtaagaacctcgtg-3'     | 78,641-78,664                    | 429                       |
|      | 5'-gtatatgaagttccccagcccac-3'    | complementary to 79,046-79,069   |                           |
| 10   | 5'-gccatatggcccaagttcaaggt-3'    | 79,450-79,473                    | 394                       |
|      | 5'-tgcttctctgctgggcaaggtaaa-3'   | complementary to 79,820-79,843   |                           |
| 11   | 5'-gcagggcagcatgtatccagtata-3'   | 83,013-83,036                    | 472                       |
|      | 5'-ctaagatgtgtccccctaaagac-3'    | complementary to 83,461-83,484   |                           |

|    |                                |                                |     |
|----|--------------------------------|--------------------------------|-----|
| 12 | 5'-gactctccctgatgaatcatgaca-3' | 83,321-83,344                  | 321 |
|    | 5'-ttcaagactggatttctgcctc-3'   | complementary to 83,618-83,641 |     |
| 13 | 5'-ttgcgaagcataggaagagcacct-3' | 85,388-85,411                  | 382 |
|    | 5'-cataaccacttctgaagttgagcc-3' | complementary to 85,746-85,769 |     |
| 14 | 5'-ataccgtccagcacgtaggtgatg-3' | 86,578-86,601                  | 423 |
|    | 5'-agggctcctctaatactggagtc-3'  | complementary to 86,977-87,000 |     |
| 15 | 5'-tgctgatccagagcttgactct-3'   | 87,820-87,843                  | 375 |
|    | 5'-gctatttgtagggagtcattgcc-3'  | complementary to 88,171-88,194 |     |
| 16 | 5'-cgtgagacttcagagtagagatgc-3' | 90,001-90,024                  | 317 |
|    | 5'-aagtgagcttgacttacagagc-3'   | complementary to 90,294-90,317 |     |
| 17 | 5'-tgcccagcccaatagtgcttttc-3'  | 94,641-94,664                  | 450 |
|    | 5'-gtttcacctctggtctgcattgga-3' | complementary to 95,067-95,090 |     |
| 18 | 5'-gagactgttgacagttcttacct-3'  | 95,156-95,179                  | 323 |
|    | 5'-gggtgccaagtagatggtatct-3'   | complementary to 95,455-95,478 |     |
| 19 | 5'-cgagtactaggaggaggagaaa-3'   | 97,915-97,938                  | 318 |
|    | 5'-ttggaggccactttgagccacat-3'  | complementary to 98,209-98,232 |     |

Supplementary Table I. (continued)

| <b>Exon</b> | <b>Structure of amplimers</b>  | <b>Nucleotide position in NT_005403</b> | <b>Length of PCR product(bp)</b> |
|-------------|--------------------------------|-----------------------------------------|----------------------------------|
| 20          | 5'-gaaccacaaggtgaaggagaaac-3'  | 101,376-101,399                         | 305                              |
|             | 5'-ctgccgatgattccagaagaca-3'   | complementary to 101,657-101,680        |                                  |
| 21          | 5'-ataacgggataatacctggggac-3'  | 108,854-108,877                         | 311                              |
|             | 5'-ccccccactcaatcccaaata-3'    | complementary to 109,141-109,164        |                                  |
| 22          | 5'-gtgactgtcacagtccatttcagg-3' | 110,919-110,942                         | 350                              |
|             | 5'-gccaggttcttctcattgattc-3'   | complementary to 111,245-111,268        |                                  |
| 23          | 5'-actcaggctcttgccaggagtat-3'  | 112,268-112,291                         | 265                              |
|             | 5'-cactagagagtagccaaagactgc-3' | complementary to 112,509-112,532        |                                  |
| 24          | 5'-agatagtctgagtggttacacagc-3' | 115,057-115,080                         | 418                              |
|             | 5'-caccaggaagtaacacatggctat-3' | complementary to                        |                                  |

|    |                                |                                     |       |
|----|--------------------------------|-------------------------------------|-------|
|    |                                | 115,451-115,474                     |       |
| 25 | 5'-gttttggtctgaggtcgtaggatg-3' | 116,677-116,700                     | 360   |
|    | 5'-ctgggtctcaaattcctcaacctg-3' | complementary to<br>117,013-117,036 |       |
| 26 | 5'-ttgaccaggaggatggtgaatgga-3' | 125,035-125,058                     | 386   |
|    | 5'-ggagaagtttctcaacaccttt-3'   | complementary to<br>125,397-125,420 |       |
| 27 | 5'-gtgcgggattcttgagggaata-3'   | 130,876-130,899                     | 318   |
|    | 5'-ctcaccagcttctatcctgtat-3'   | complementary to<br>131,170-131,193 |       |
| 28 | 5'-tggctggaggaatttggttctgc-3'  | 133,167-133,191                     | 412   |
|    | 5'-actgggtgctgtaccactgactga-3' | complementary to<br>133,555-133,578 |       |
| 29 | 5'-cctcatacagggttggtgttta-3'   | 133,999-134,022                     | 286   |
|    | 5'-aatgcacattgctcttgcctcct-3'  | complementary to<br>134,261-134,284 |       |
| 30 | 5'-ggcttctctggttactattgctg-3'  | 135,596-135,619                     | 334   |
|    | 5'-ccacaacctggattaactagcag-3'  | complementary to<br>135,906-135,929 |       |
| 31 | 5'-tgtggcttgcataaatcctcatgg-3' | 136,903-136,926                     | 282   |
|    | 5'-ctcagatagatggcatctgtggaa-3' | complementary to 137,184            |       |
| 32 | 5'-aaagtcagcctggcaggaagtgtt-3' | 140,739-140,762                     | 236   |
|    | 5'-actgatggaatgctctctgcaga-3'  | complementary to<br>140,951-140,974 |       |
| 33 | 5'-gctccaagacacctgaaaatgct-3'  | 142,624-142,647                     | 400   |
|    | 5'-ccaagagaggaatgtagccttct-3'  | complementary to<br>143,000-143,023 |       |
| 34 | 5'-gagattgtgtcactacactccagt-3' | 143,534-143,558                     | 576   |
|    | 5'-tagtatagaatggagccaagcagg-3' | complementary to<br>144,086-144,109 |       |
| 35 | 5'-ttgccctctgctggtttaaact-3'   | 144,669-144,692                     | 1,162 |
|    | 5'-gttccatttttcctatcctagcc-3'  | complementary to<br>145,806-145,830 |       |

**Supplementary Table I** *Oligodeoxynucleotides used for amplification of human AOX1 exons*

The oligonucleotides used for the amplification of the AOX1 exons correspond to intronic sequences and are numbered according to the deposited genomic sequence (NT\_005403). The position of the oligonucleotides and the length of the PCR products are listed in the Table.
